# Supplementary material
Source: publisher site journal article supplement (https://www.dovepress.com/article/341240)

**Supplementary materials**

Supplementary Figure 1: The Arabic version of the questionnaire.


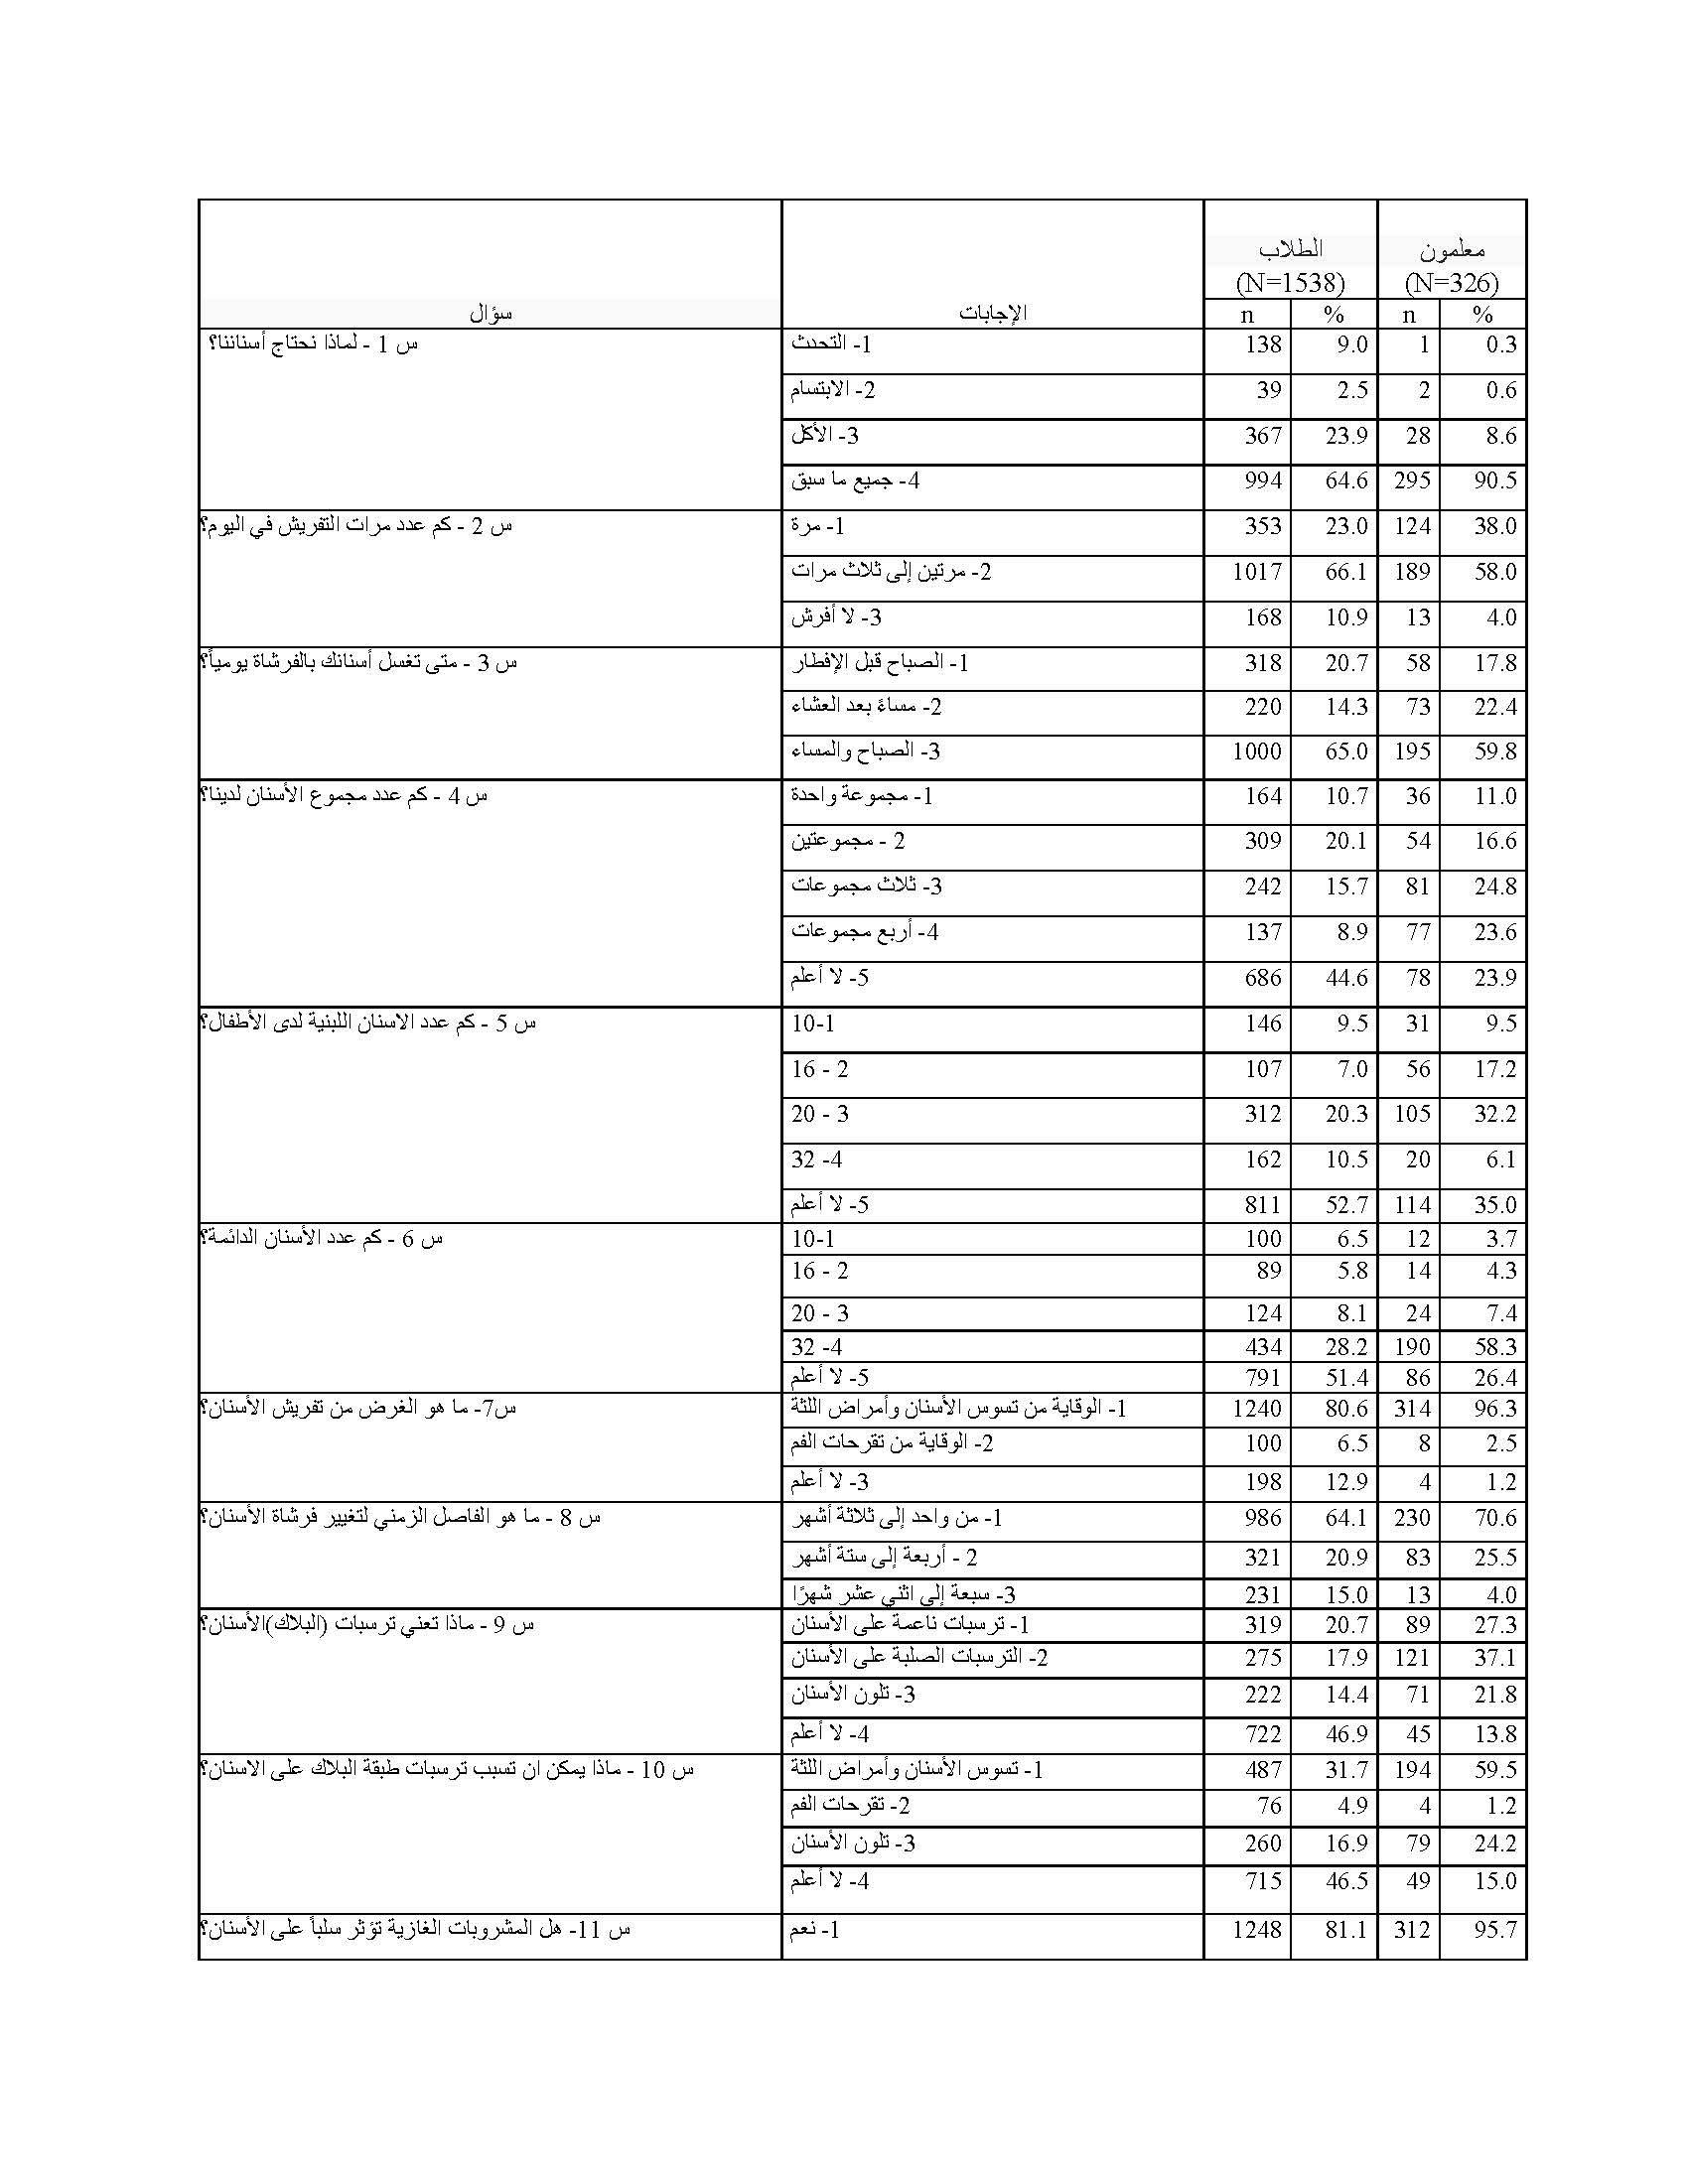


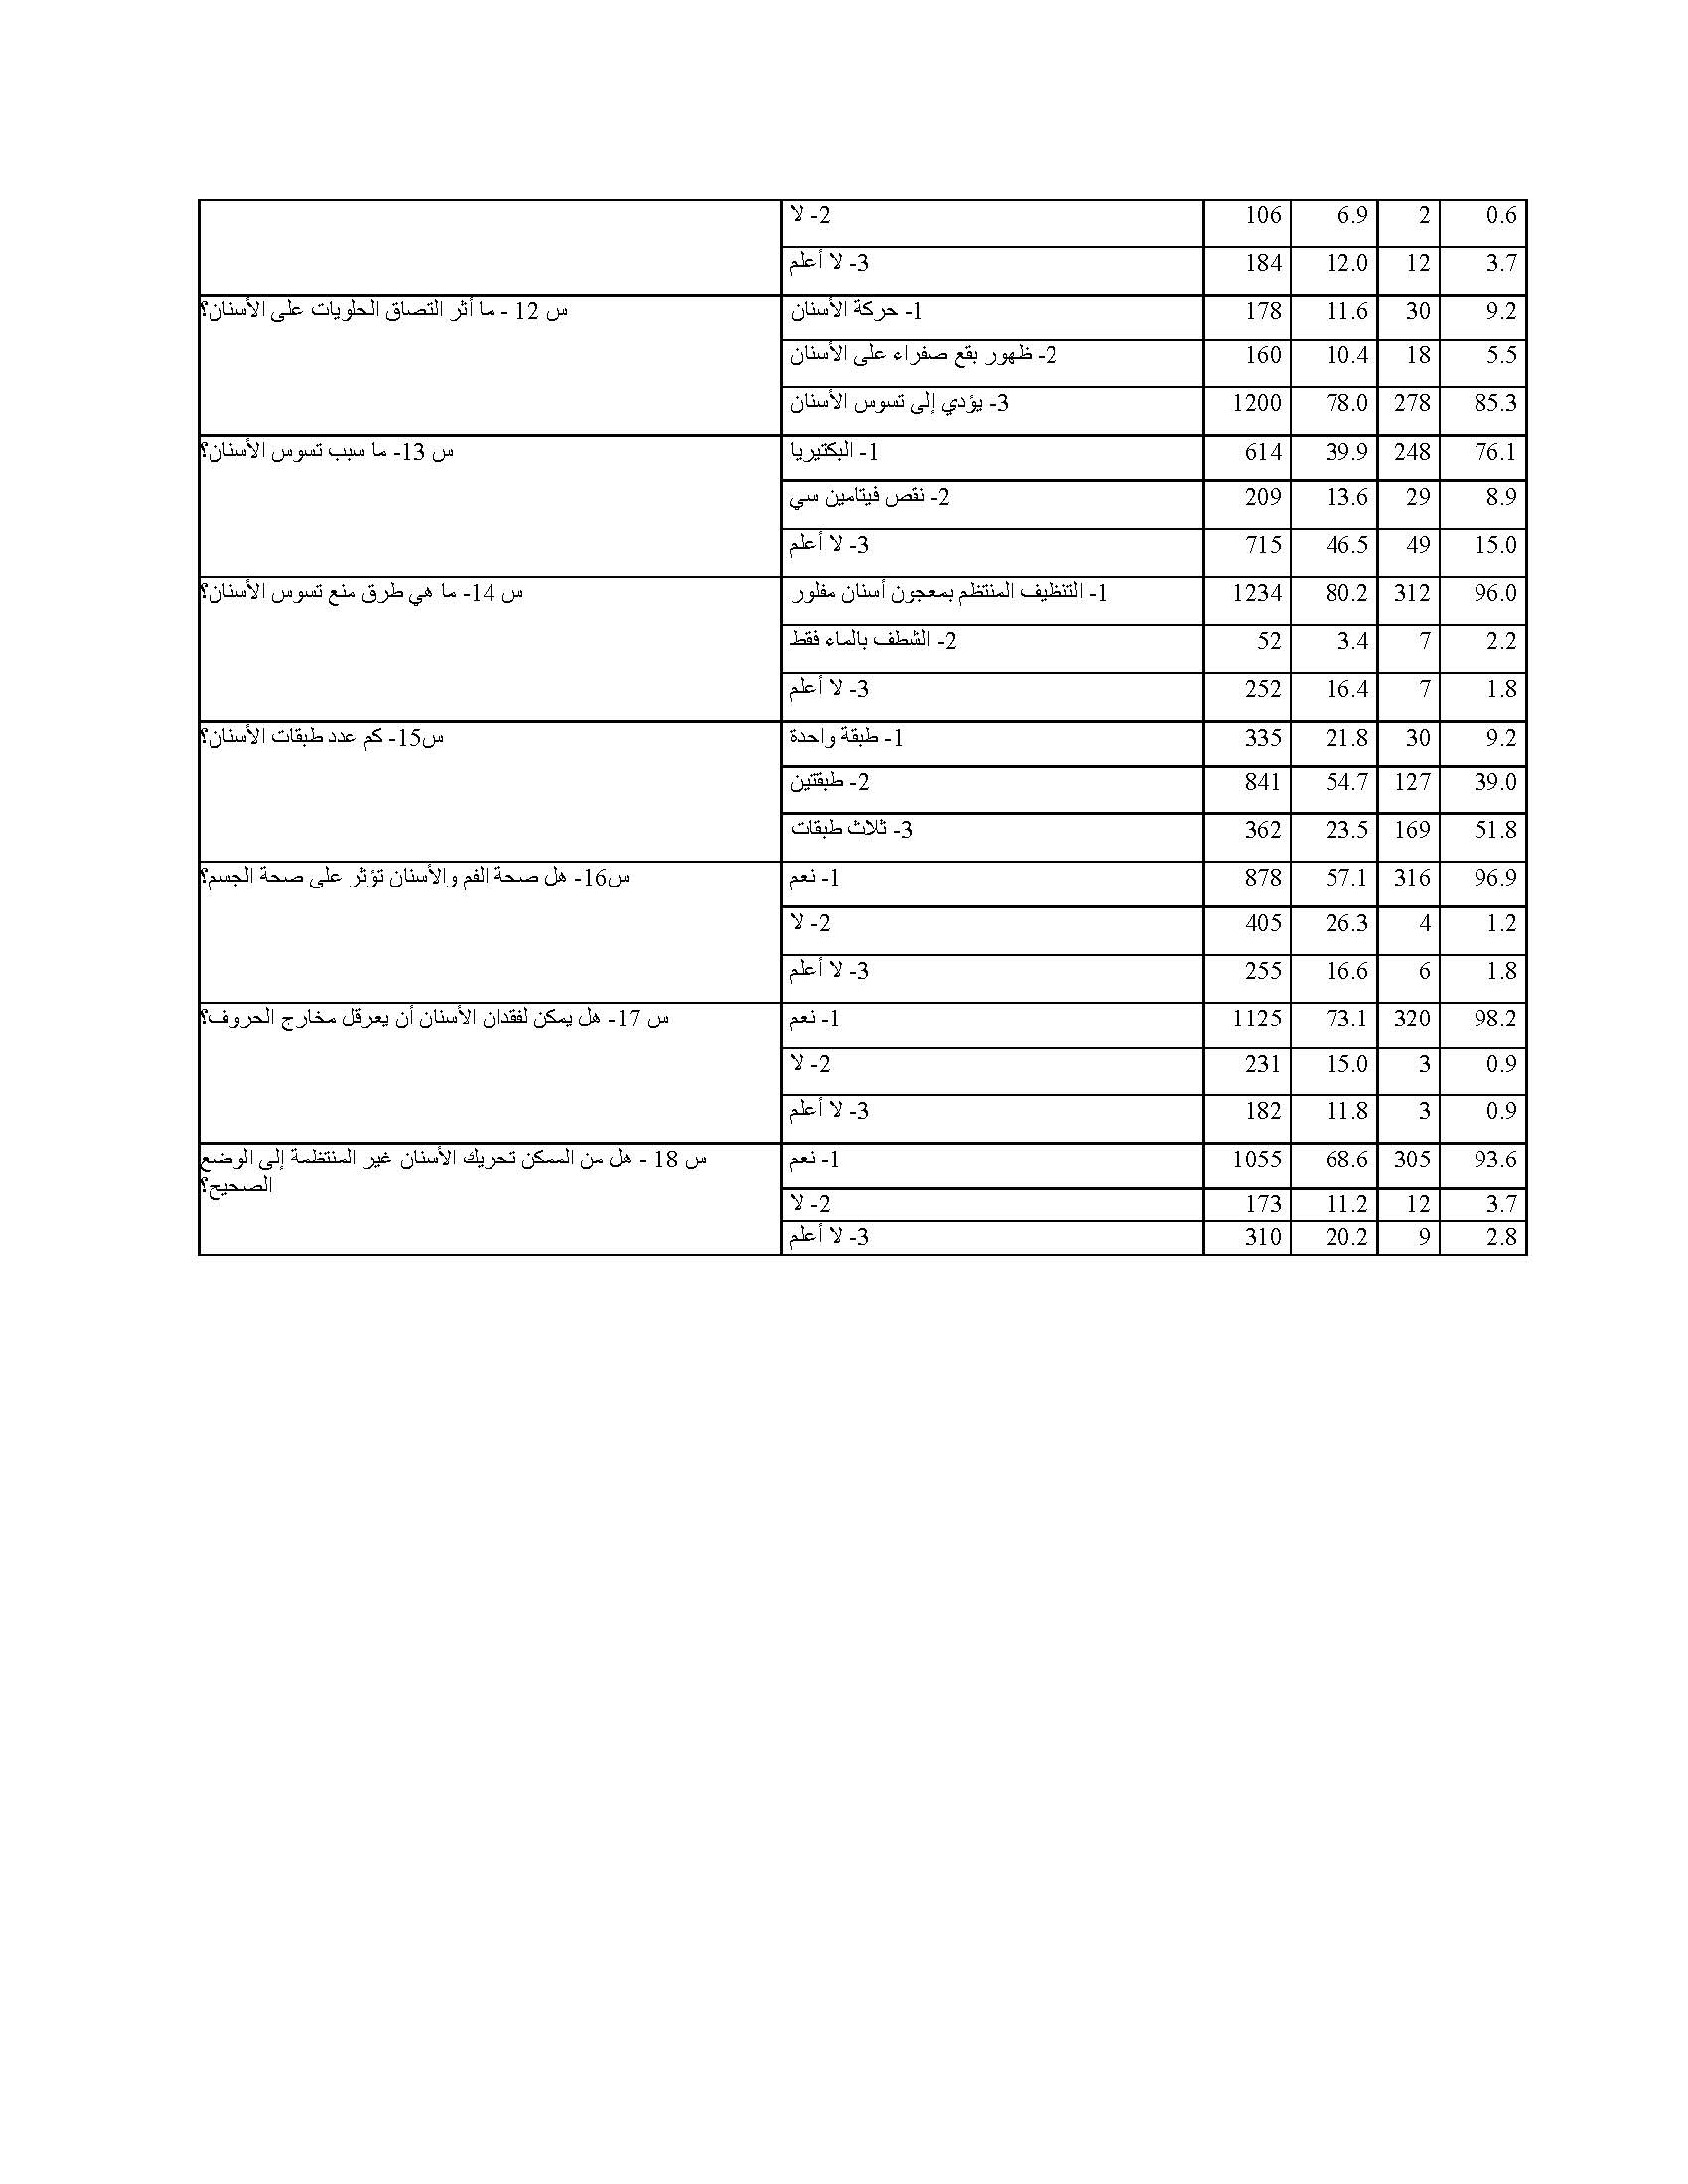


Supplementary Figure 2: English version of the questionnaire


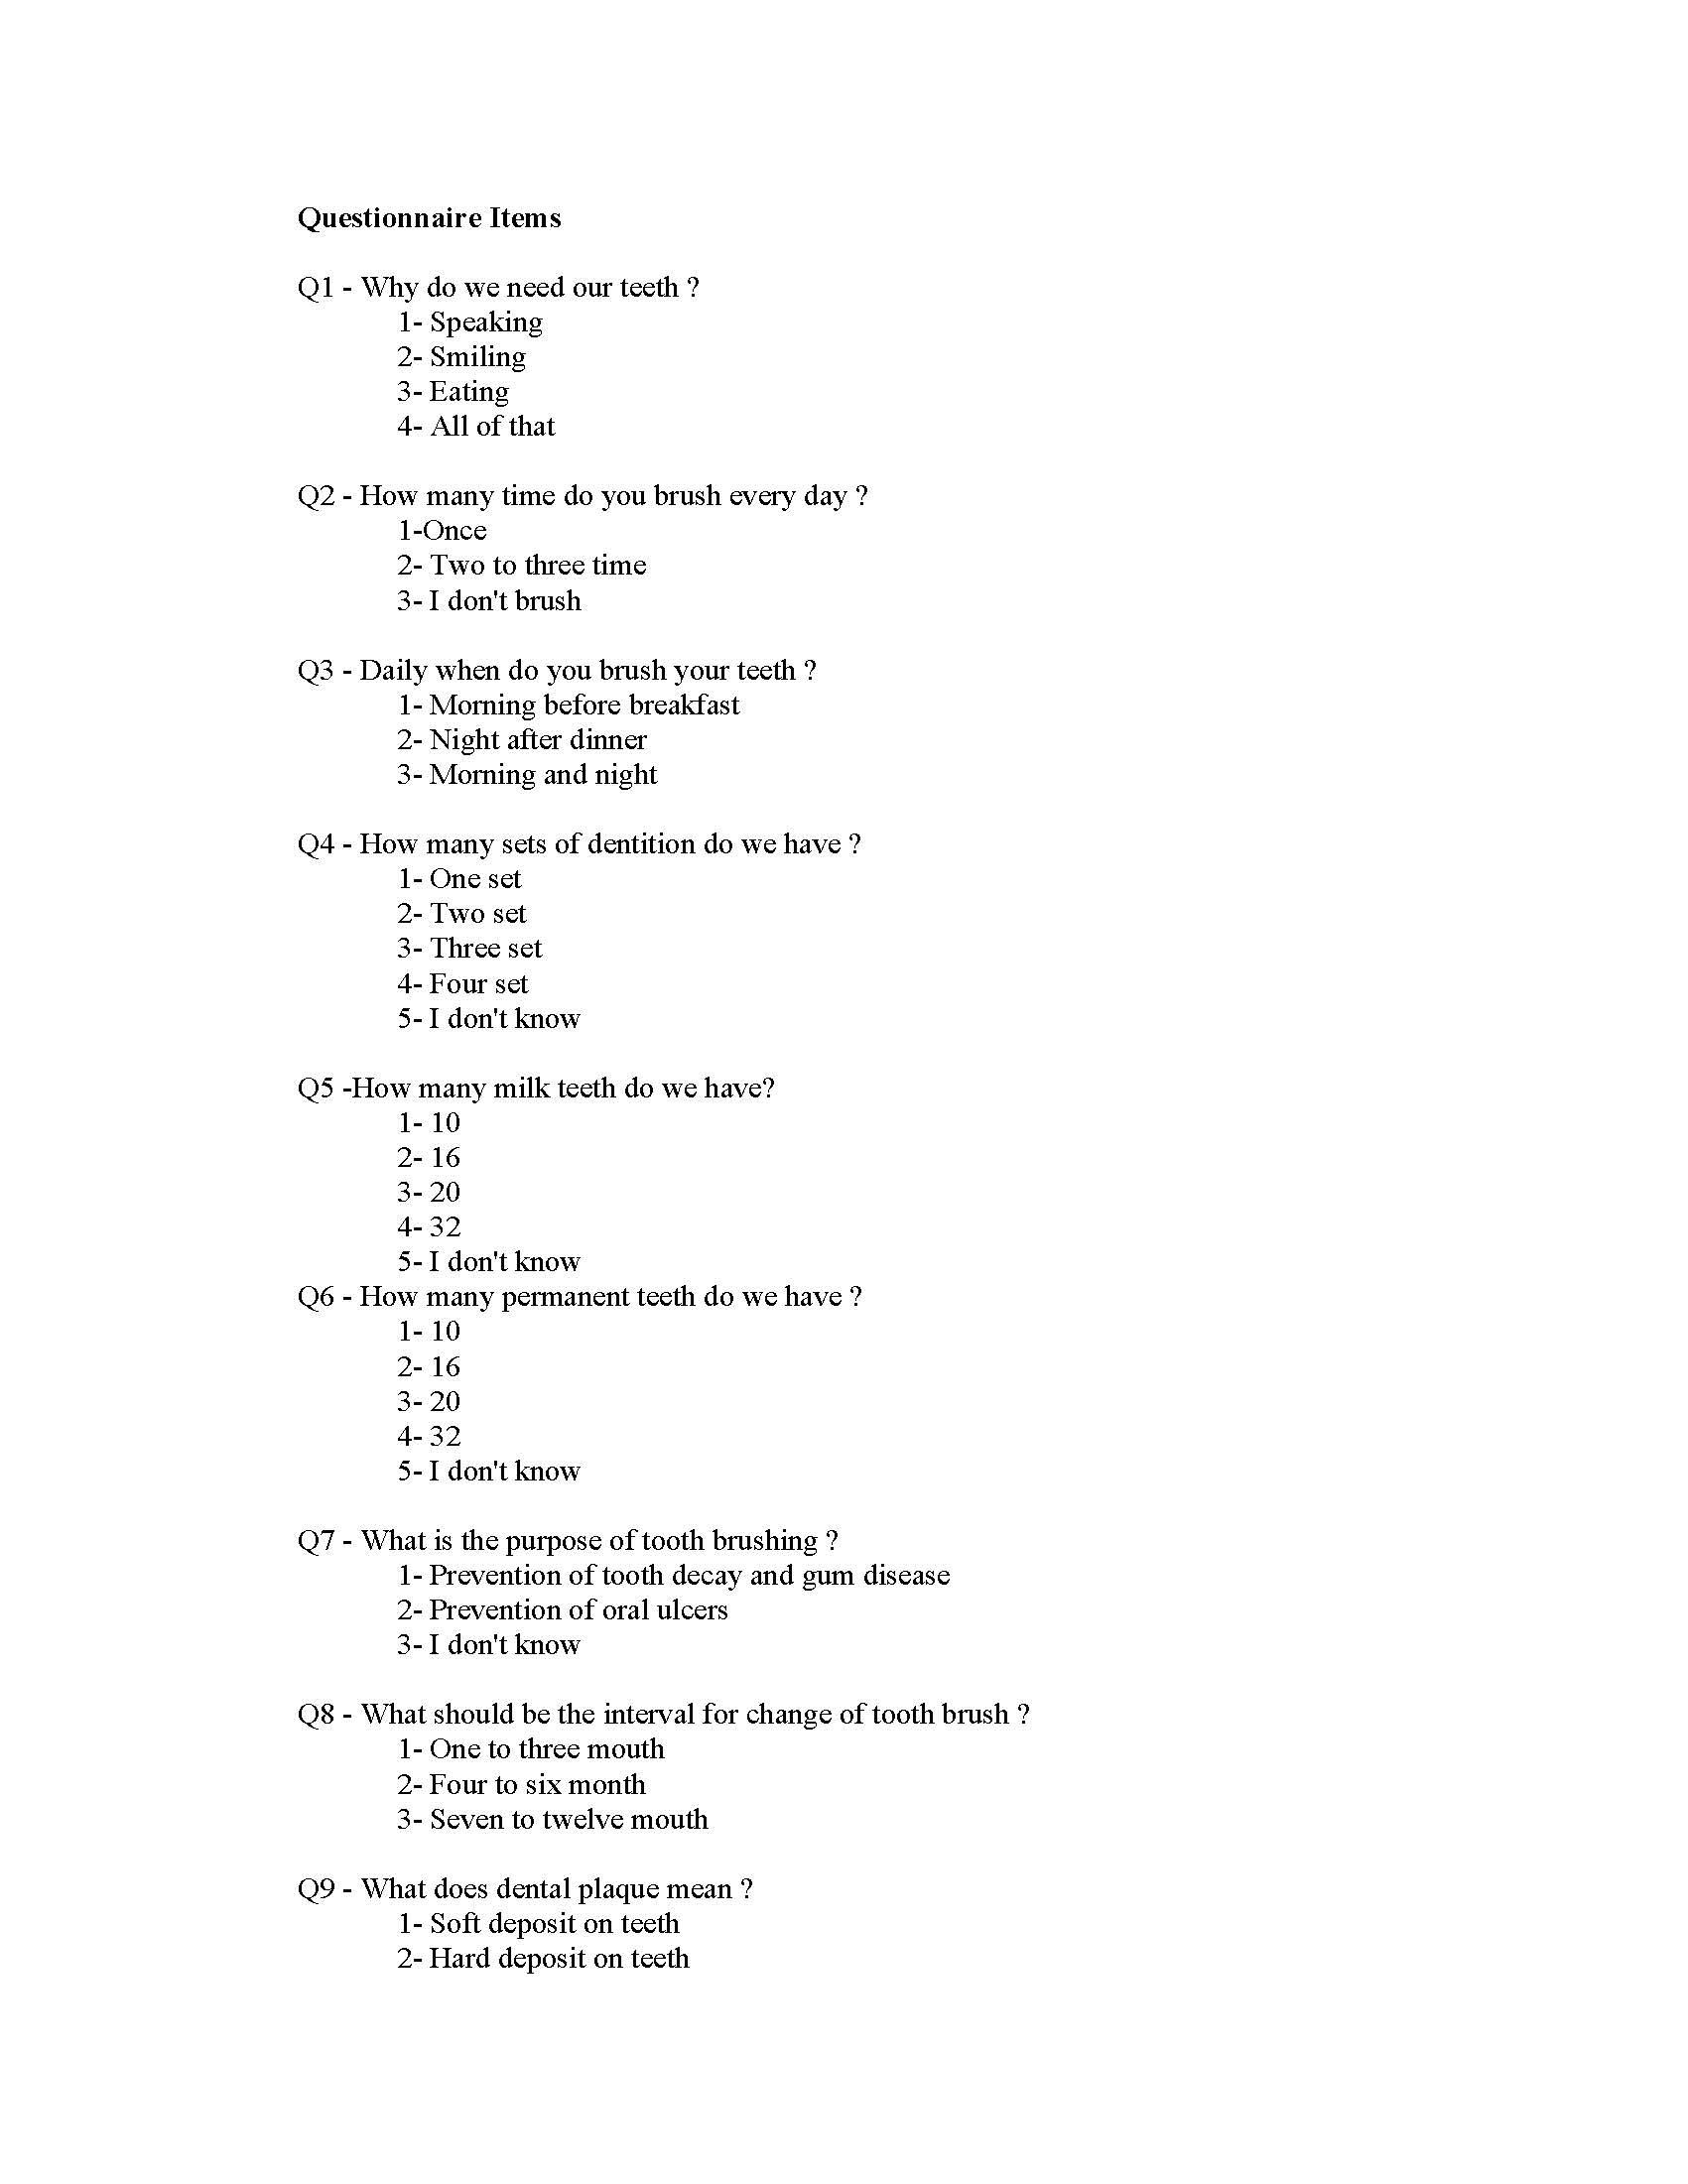


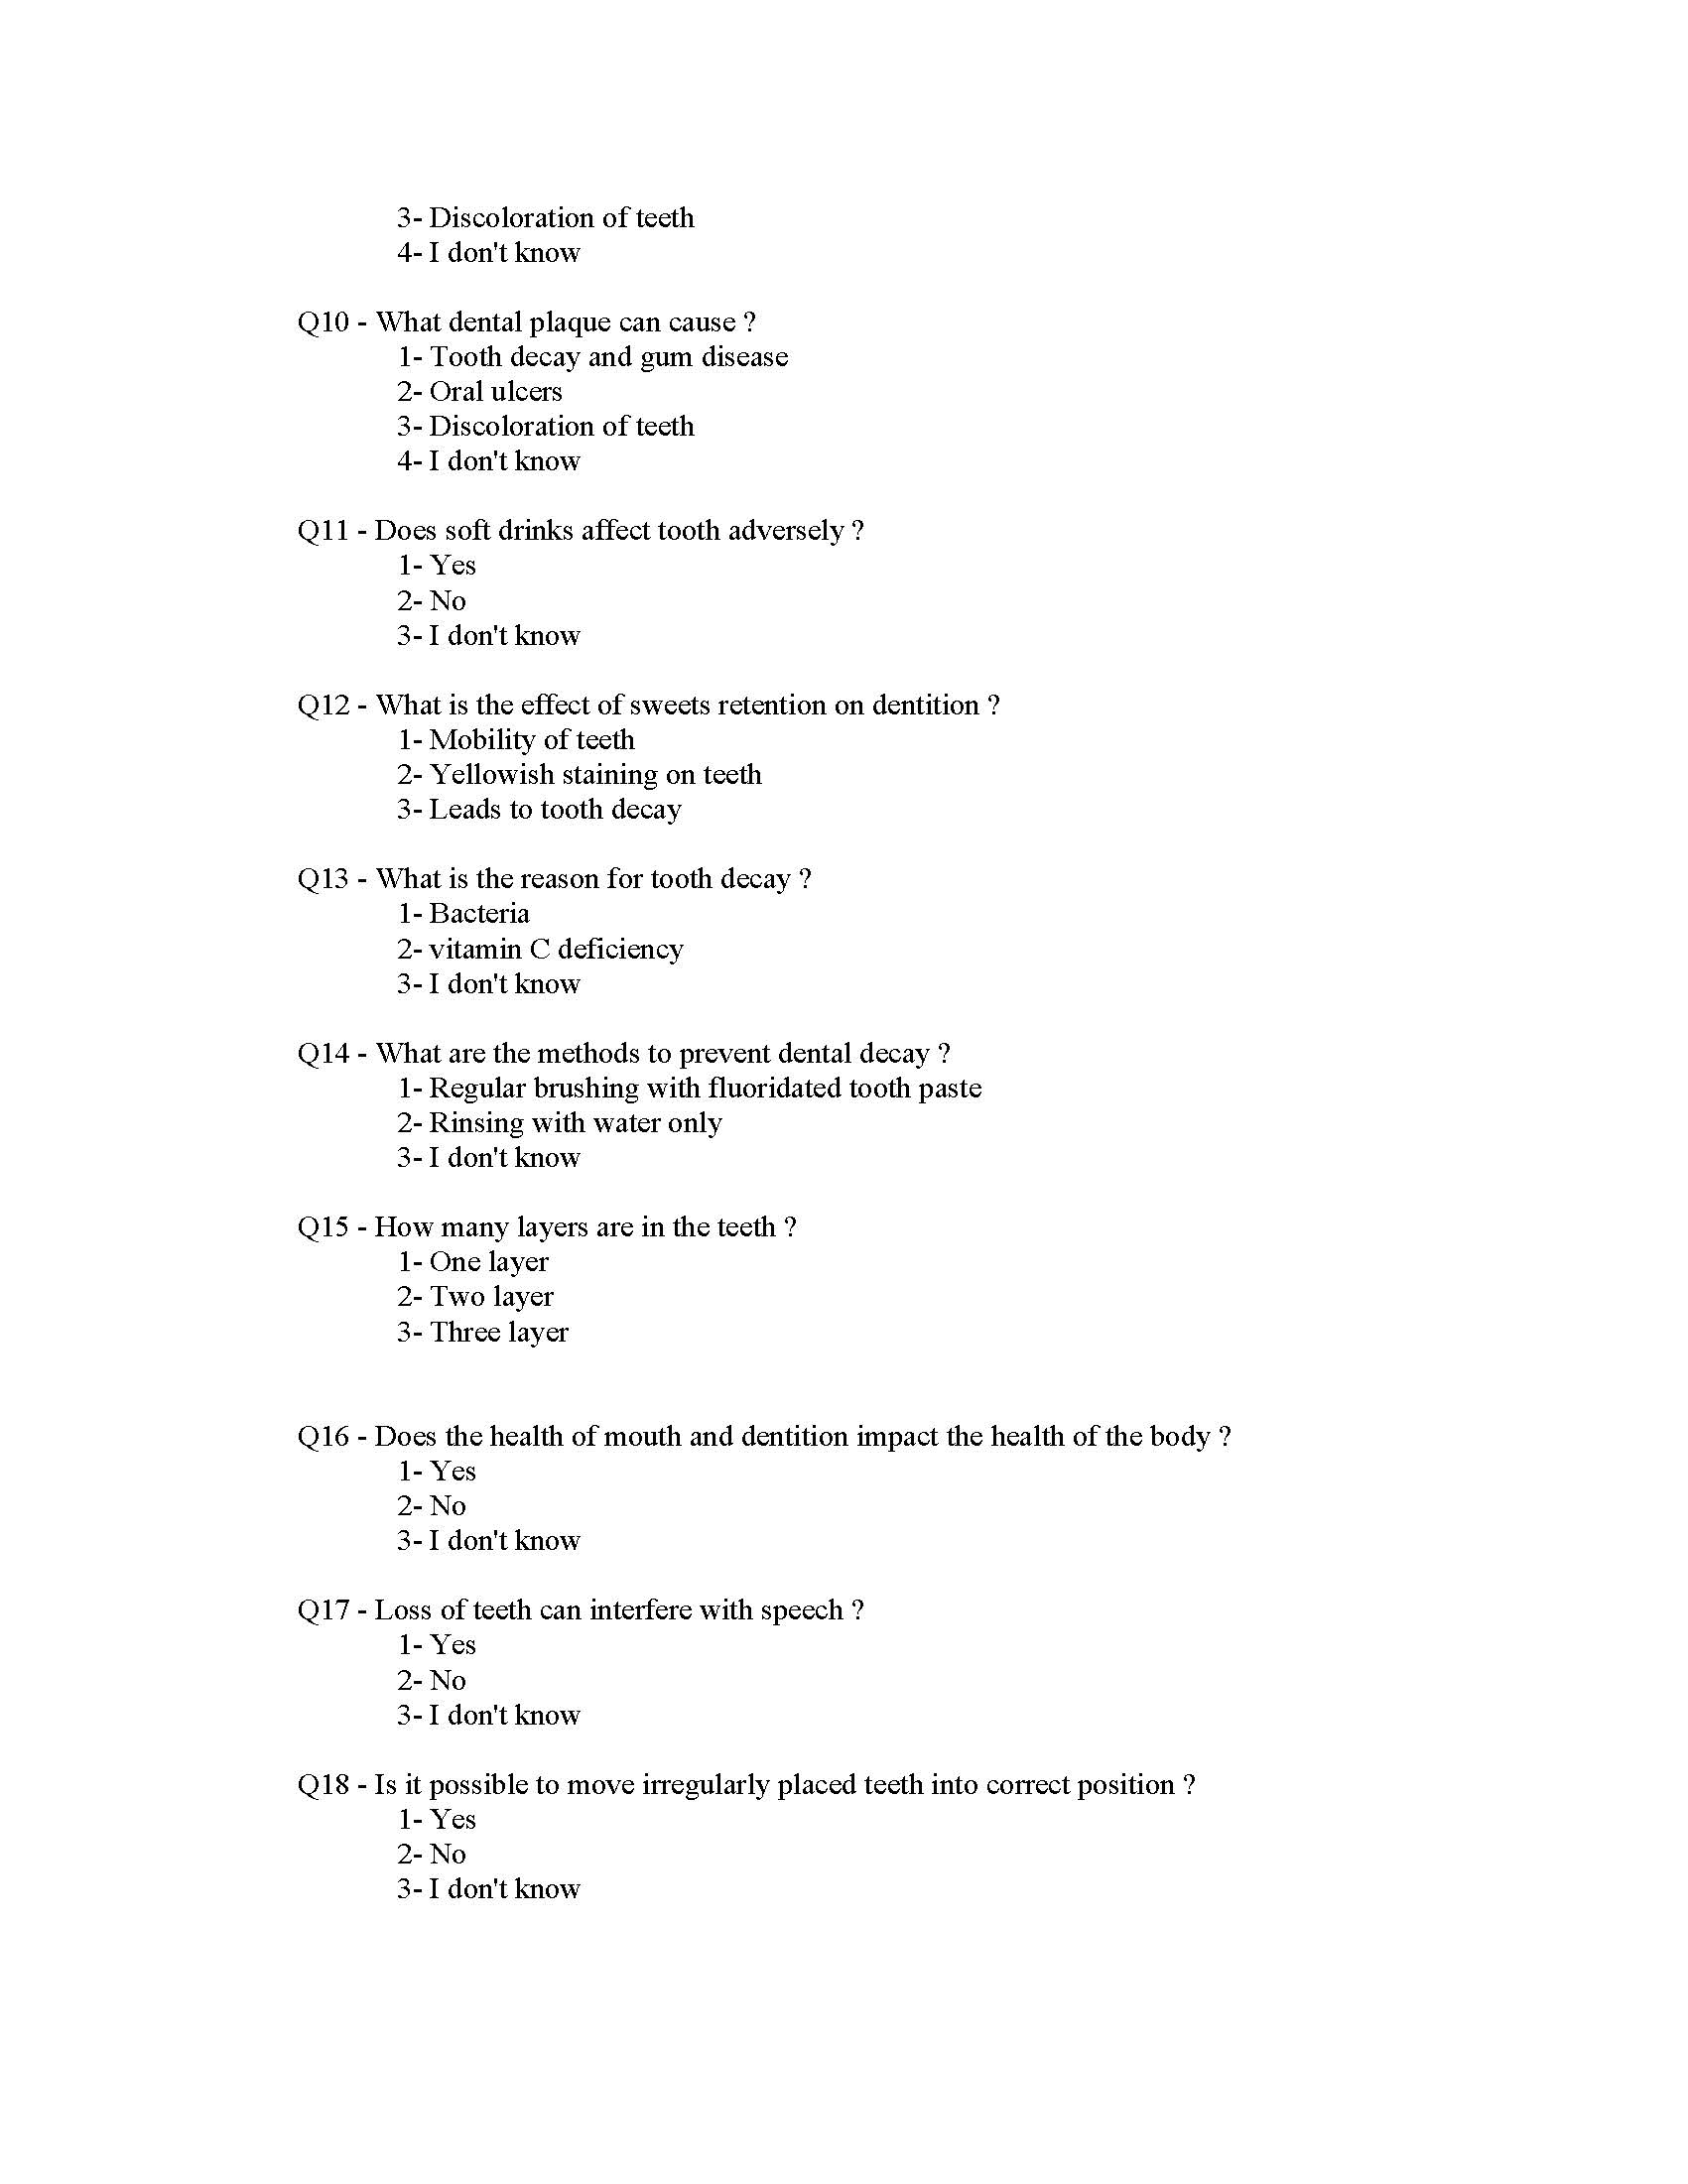

Supplement: Supplementary file 1 [file get_supplementary_file.php]
